# Supplementary material for: RhoA downregulation in the murine intestinal epithelium results in chronic Wnt activation and increased tumorigenesis
Source: PubMed Central journal article supplement — iScience. 2024 Mar 1;27(4):109400. doi: 10.1016/j.isci.2024.109400 (PMC10959657; doi:10.1016/j.isci.2024.109400), 2024-03-01
Supplement: mmc2.pdf [file mmc2.pdf]

**Supplementary Table S1**

| <b>Oligonucleotides used in this study</b> |         |                                             |                  |
|--------------------------------------------|---------|---------------------------------------------|------------------|
| <i>RhoA</i> <sup>T19N</sup>                | Forward | 5'- CTCATAGTCTTCAGCAAGGACCAGTT -3'          | Mouse genotyping |
| <i>RhoA</i> <sup>T19N</sup>                | Reverse | 5'- ATCATTCCGAAGATCCTTCTTATT -3'            | Mouse genotyping |
| <i>Vil-Cre</i>                             | Forward | 5'- CAAGCCTGGCTCGACGGCC -3'                 | Mouse genotyping |
| <i>Vil-Cre</i>                             | Reverse | 5'- CGCGAACATCTTCAGGTTCT -3'                | Mouse genotyping |
| <i>RhoA</i>                                | Forward | 5'- CTCATAGTCTTCAGCAAGGACCAGTT -3'          | RT-qPCR          |
| <i>RhoA</i>                                | Reverse | 5'- ATCATTCCGAAGATCCTTCTTATT -3'            | RT-qPCR          |
| <i>c-Myc</i>                               | Forward | 5'- GCCCCCAAGGTAGTGATCCT -3'                | RT-qPCR          |
| <i>c-Myc</i>                               | Reverse | 5'- TGCTCGTCTGCTTGAATGGA -3'                | RT-qPCR          |
| <i>EphB2</i>                               | Forward | 5'- GCGGCTACGACGAGAACAT -3'                 | RT-qPCR          |
| <i>EphB2</i>                               | Reverse | 5'- GGCTAAGTCAAAATCAGCCTCA -3'              | RT-qPCR          |
| <i>Jun</i>                                 | Forward | 5'- CCTTCTACGACGATGCCCTC -3'                | RT-qPCR          |
| <i>Jun</i>                                 | Reverse | 5'- GGTTCAAGGTCATGCTCTGTTT -3'              | RT-qPCR          |
| <i>Cd44</i>                                | Forward | 5'- CTGCCATCTAGCACTAAGAG -3'                | RT-qPCR          |
| <i>Cd44</i>                                | Reverse | 5'- GTCTGGGTATTGAAAGGTGTAGC -3'             | RT-qPCR          |
| <i>18S</i>                                 | Forward | 5'- AGTCCCTGCCCTTTGTACACA -3'               | RT-qPCR          |
| <i>18S</i>                                 | Reverse | 5'- GATCCGAGGGCCTCACTAAAC -3'               | RT-qPCR          |
| <i>18S</i>                                 | Probe   | 5'- FAM-6CGCCCGTCGCTACTACCGATTGG0-TAMRA -3' | RT-qPCR          |
